# Supplementary material
Source: publisher figshare collection journal article supplement (https://karger.figshare.com/ndownloader/files/40124701)
Supplement: Supplementary file 1 [file 40124701]

Supplemental table 3. List of primers used in quantitative real-time PCR

| primer | sequence 5'→3’ | amplify length (bp) | annealing  temperature (°C) |
| --- | --- | --- | --- |
| *ARID1B*-ex6-F | GCTCCATTGATGACCTCCCC | 220 | 60 |
| *ARID1B*-ex6-R | GGAGAGATTGGGCCAGATCG |
| *ARID1B*-ex8-F | GCAGGCACACAAAGAAACCC | 207 | 60 |
| *ARID1B*-ex8-R | TGCTGCCATGCATTTTGGAG |
| *EHMT1*-ex19-F | AGAACATTTGCCTGCACTGG | 148 | 58 |
| *EHMT1*-ex19-R | ACACAGTCGTAGCGGTTCTC |
| *EHMT1*-ex26-F | GGTTCATCAACCACCACTGC | 97 | 60 |
| *EHMT1*-ex26-R | GTGCTGAAGAAGGCGATCC |
| *FOXP1*-ex8-F | GTTCCCGTGTCAGTGGCTAT | 105 | 60 |
| *FOXP1*-ex8-R | GAGAACCTGGAGCTGCTGAG |
| *FOXP1*-ex11-F | TGCAGCAGCTCTGGAAAGAA | 101 | 60 |
| *FOXP1*-ex11-R | GGAGGAGACACATGTCGTGG |
| *ALB*-F | TGAAACATACGTTCCCAAAGAGTTT | 81 | 58 |
| *ALB*-R | CTCTCCTTCTCAGAAAGTGTGCATAT |
